# Inhaltsübersicht

|                                       | Seite <sup>*</sup> |
|---------------------------------------|--------------------|
| Vorwort _____                         | IX                 |
| Buch 1 · Allgemeiner Teil             |                    |
| Abschnitt 3 · Rechtsgeschäfte         |                    |
| Titel 2 · Willenserklärung            |                    |
| §§ 125–127 _____                      | 1                  |
| Vorbem zu §§ 127a, 128 (BeurkG) _____ | 167                |
| §§ 127a–129 _____                     | 550                |
| Sachregister _____                    | 621                |

---

<sup>\*</sup> Zitiert wird nicht nach Seiten, sondern nach Paragraph bzw Artikel und Randnummer; siehe dazu auch S VI.
